# Supplementary material for: Chemically Induced Chromosomal Interaction (CICI) method to study chromosome dynamics and its biological roles
Source: PubMed Central journal article supplement (PMC8828778; doi:10.1038/s41467-022-28416-3), 2022-02-09
Supplement: 41467_2022_28416_MOESM1_ESM.pdf [file 41467_2022_28416_MOESM1_ESM.pdf]

## **Supplementary Information**

This file includes:

Supplementary Figure 1-7

Supplementary Table 1-3

Separate files:

Supplementary Data 1-2

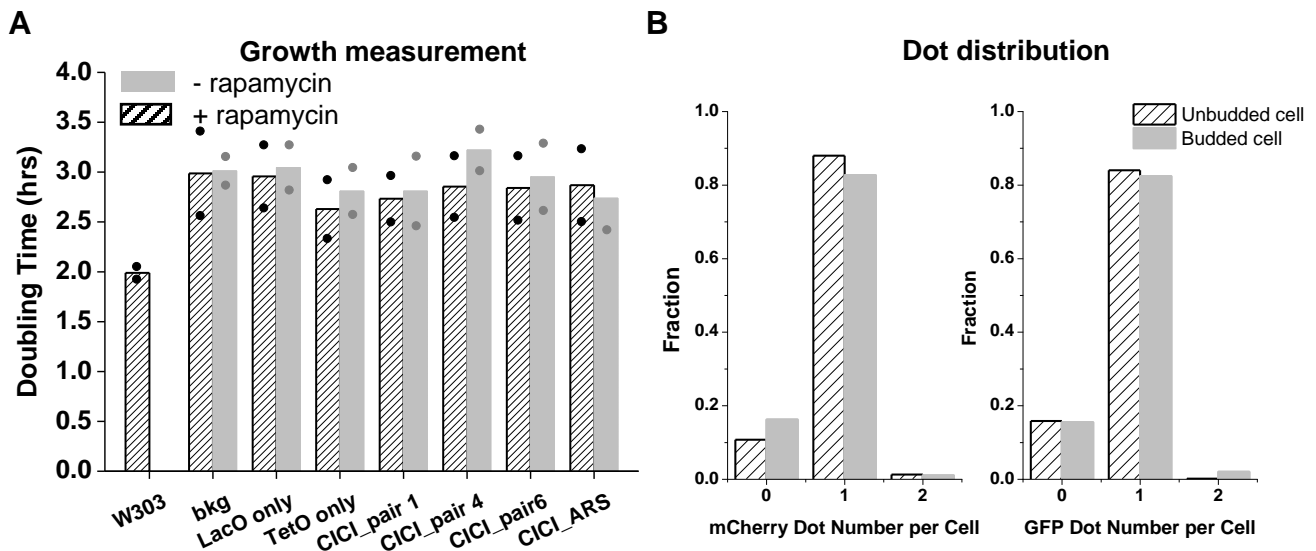

**Supplementary Figure 1. Characterization of CICI and control strains.** **A)** Doubling times of multiple strains, including wt strain (W303 a/alpha), rapamycin-resistant background (bkg), strains containing LacO and TetO but no LacI and TetR (LacO or TetO only), and four CICI strains (containing both arrays and the bound proteins). The rapamycin-resistant strains in general have comparable growth rates, regardless of the presence of rapamycin, LacO / TetO arrays, or different LacI / TetR fusions. Bar represents mean of two biological replica (individual data points are shown). **B)** Histograms of the number of LacI and TetR dots in unbudded and budded cells (only the dots in the mother cells are counted, total # of cells analyzed  $N=1168$ , cells that contain LacI dots  $N=940$ , cells that contain TetR dots  $N=902$ ). We mostly observed a single dot, even in the budded cells, indicating that sister chromatids are mostly tethered together before one copy quickly moved into the daughter cells. 10-20% of cells contain no detectable dots, which is more likely due to imaging problems or transient dissociation of LacI-GFP / TetR-mCherry rather than a permanent loss of LacO / TetO arrays, because during time-lapse imaging, we often observe these cells regaining dots in later frames.

A

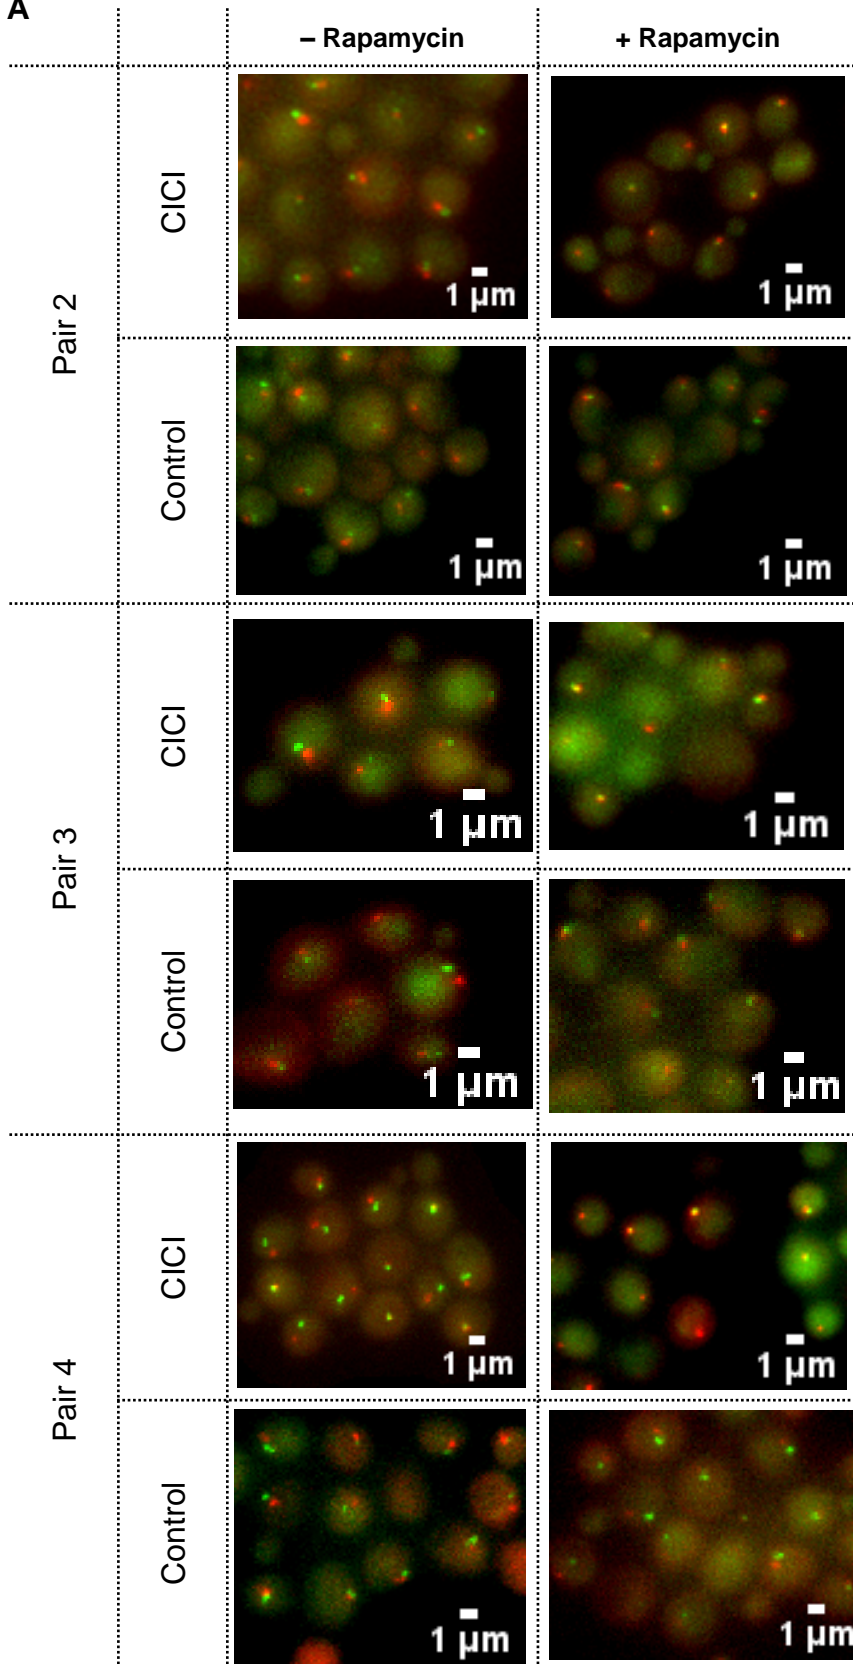

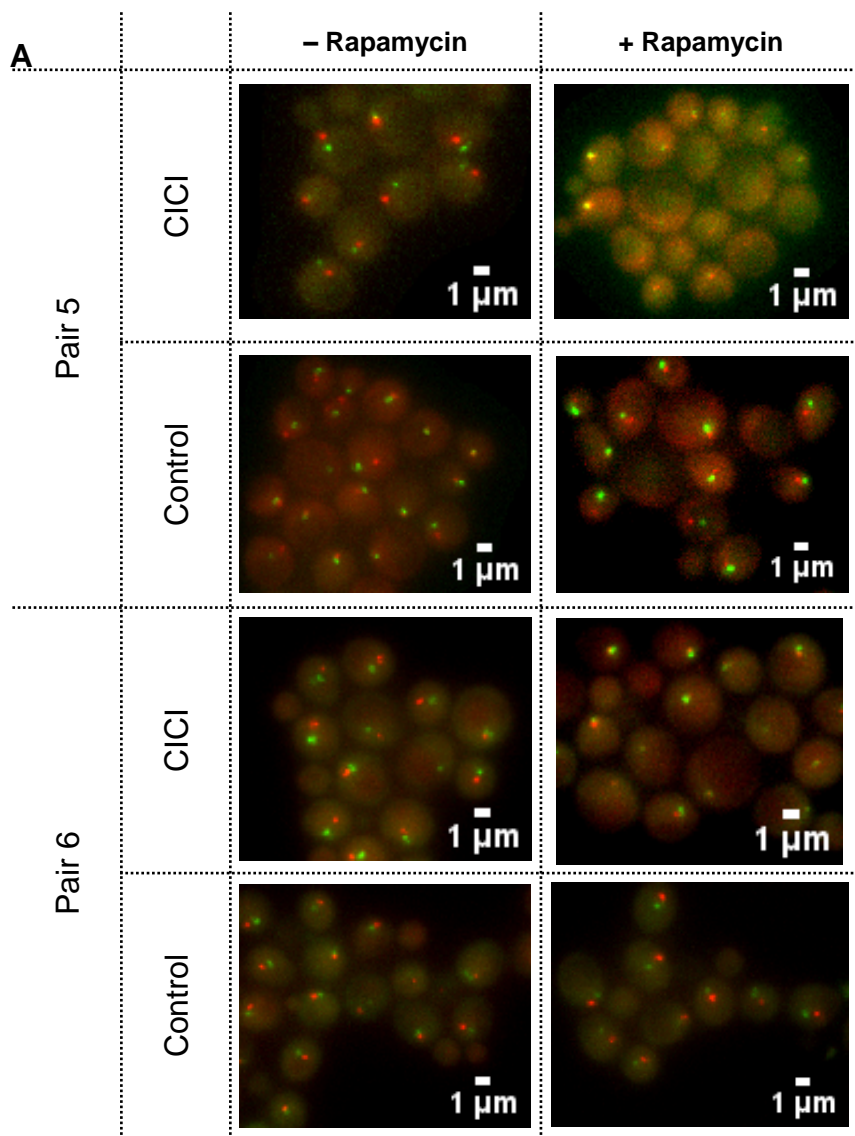

**Supplementary Figure 2. Sample images and distance histograms.**

**A)** Sample images of CICI and control strains containing pair 2-6 (the + rapamycin data represents 60min rapamycin incubation). **B)** Violin plot of initial distances of CICI and CICI control strains. White dot indicates sample median. The thick bar in the middle indicates the range from first quartile to third quartile, and the line extends from the bar to extra 1.5 inter-quartiles. Number of points for CICI strain, pair 1-6: 116, 63, 70, 192, 205, 666; Number of points for control strain, pair 1-6: 407, 34, 90, 62, 117, 489. **C)** Same as B after 60min rapamycin incubation. Number of points for CICI strain, pair 1-6: 46, 42, 63, 53, 258, 197; Number of points for control strain, pair 1-6: 100, 183, 99, 82, 10, 547.

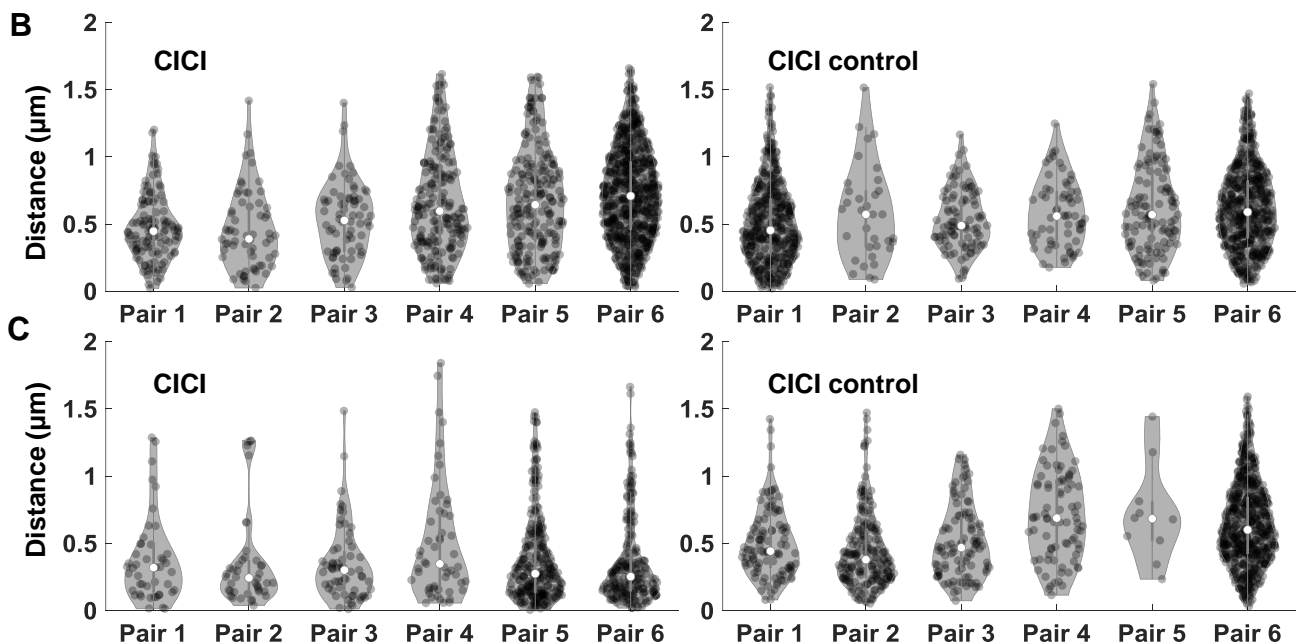

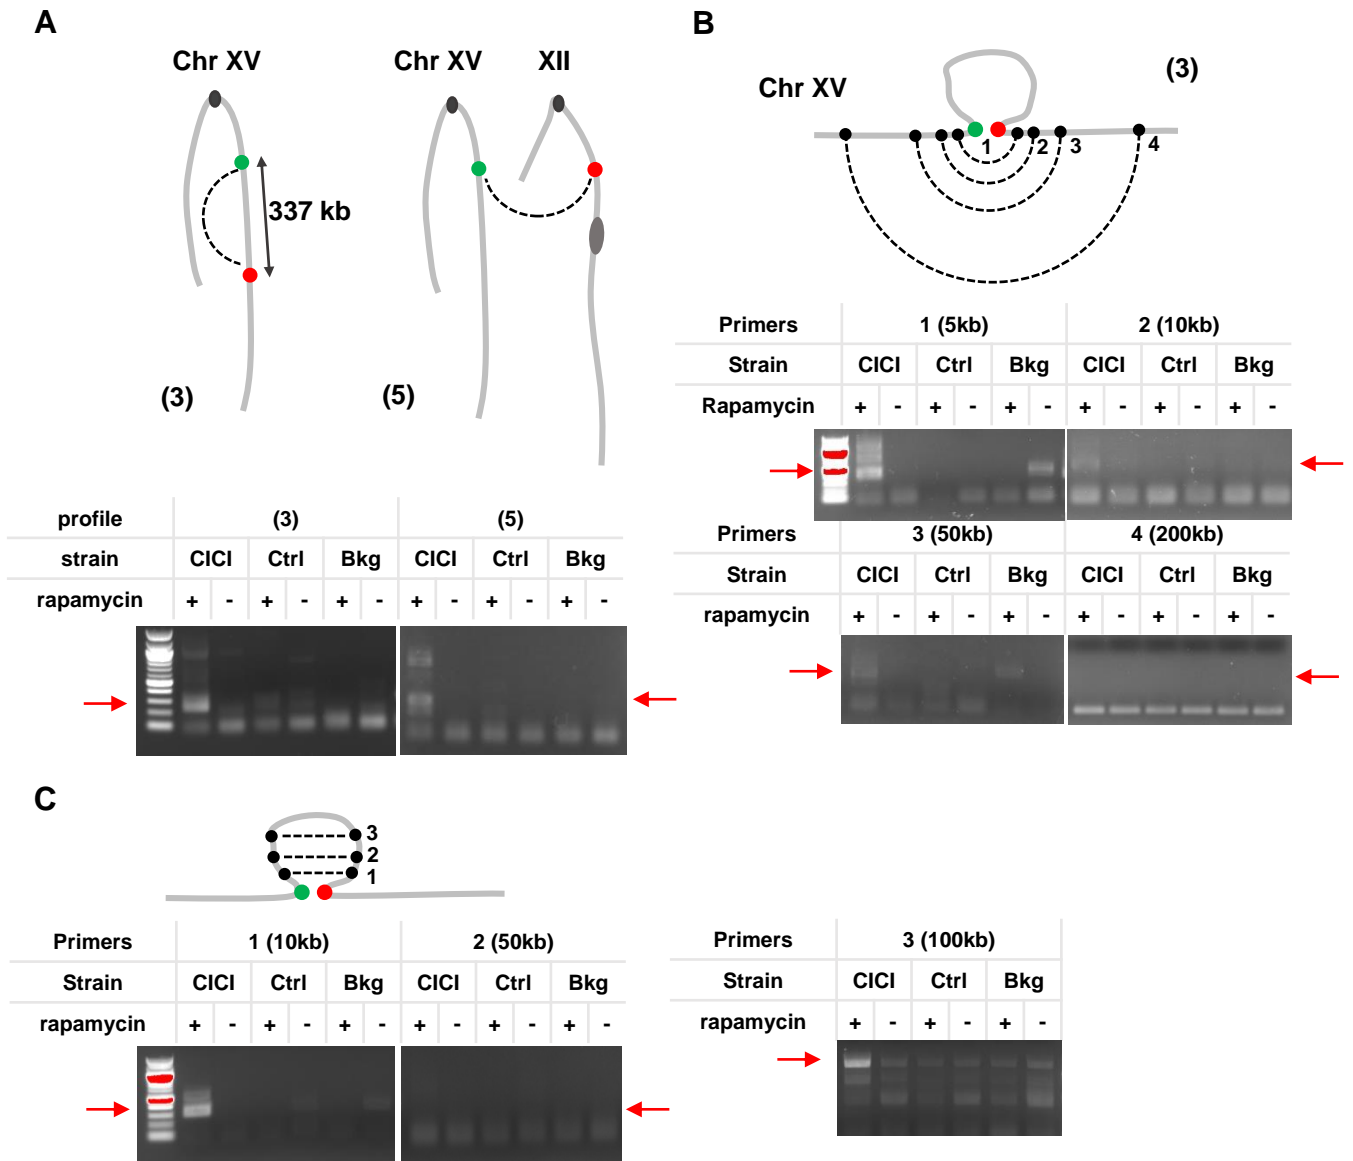

**Supplementary Figure 3. 3C experiments confirm the CICI-mediated contact formation. A)**

3C signals of loci pairs 3 and 5 using primers immediately adjacent to the LacO / TetO arrays. We carried out the 3C measurement  $\pm$  rapamycin using the CICI strain, rapamycin-resistant background strain, and the -FKBP12/FRB control strain. 100bp ladder is shown on the left of the gel (same as in B & C). Red arrows represent the expected 3C PCR product. 3C signals are only visible in the CICI strain +rapamycin. Same measurements were repeated at least twice and were shown to be reproducible (same as in B and C). **B)** Contacts outside the loop. 3C signals over four pairs of loci are examined. For pair 1, each primer is 5kb away from the LacO / TetO insertions sites, and this number is 10kb, 50kb, and 200kb for other tested 3C pairs. CICI-induced 3C signals were detected for regions that are 5 and 10kb away, but become very weak at 50kb, and undetectable at 200kb. **C)** Contacts inside the loop. Three loci pairs that are 10kb, 50kb, and 100kb from LacO/TetO are examined. Increased 3C signals are detected at 10kb and 100kb.

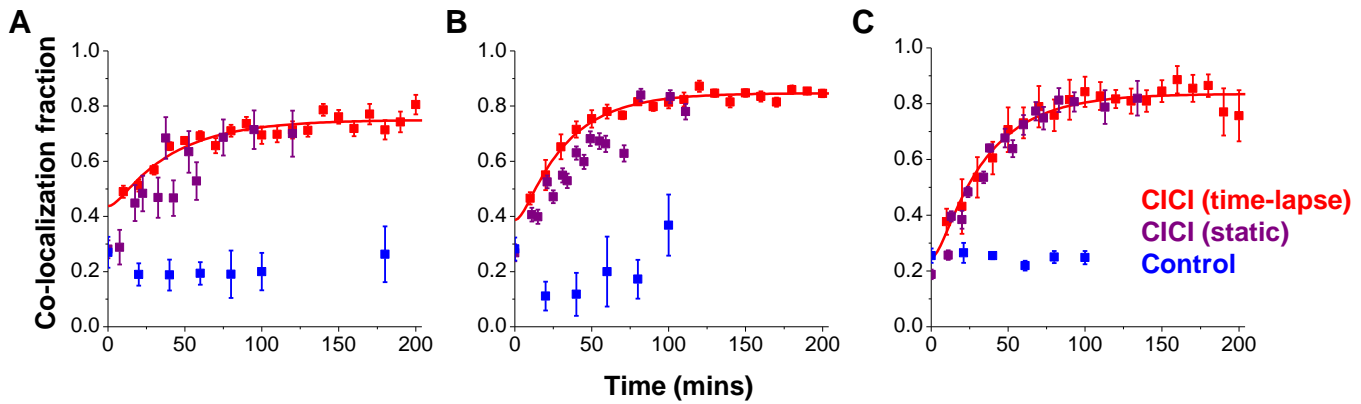

**Supplementary Figure 4. Comparison of time-lapse and static measurement of CICI formation.** **A)** Co-localization of CICI pair 4 as a function of time measured by time-lapse imaging (Total # of cells  $N = 1756$ ). Fitting this data with the red curve yields CICI efficiency:  $0.56 \pm 0.19$  and  $t_{1/2}$ :  $27 \text{ min} \pm 1.3$ . These numbers are similar to the ones we obtained from the static measurements: CICI efficiency:  $0.69 \pm 0.09$ , and  $t_{1/2}$ :  $37 \pm 9 \text{ min}$ . The static measurements of the control is shown in blue. Error bars represent standard error (same for B and C). **B)** Same as A) but for pair 5 ( $N = 1168$  for time-lapse measurements). The parameters from the time-lapse measurements: CICI efficiency  $0.75 \pm 0.12$ , and  $t_{1/2} = 21 \pm 3 \text{ min}$ . The ones from the static measurements:  $0.81 \pm 0.10$ , and  $t_{1/2}$ :  $33 \pm 11 \text{ min}$ . **C)** Same as A) but for pair #6 ( $N = 1541$  for time-lapse measurements). The parameters from the time-lapse measurements: CICI efficiency  $0.78 \pm 0.23$ , and  $t_{1/2} = 22 \pm 3 \text{ min}$ . The ones from the static measurements:  $0.78 \pm 0.06$ , and  $t_{1/2}$ :  $21 \pm 3.5 \text{ min}$ .

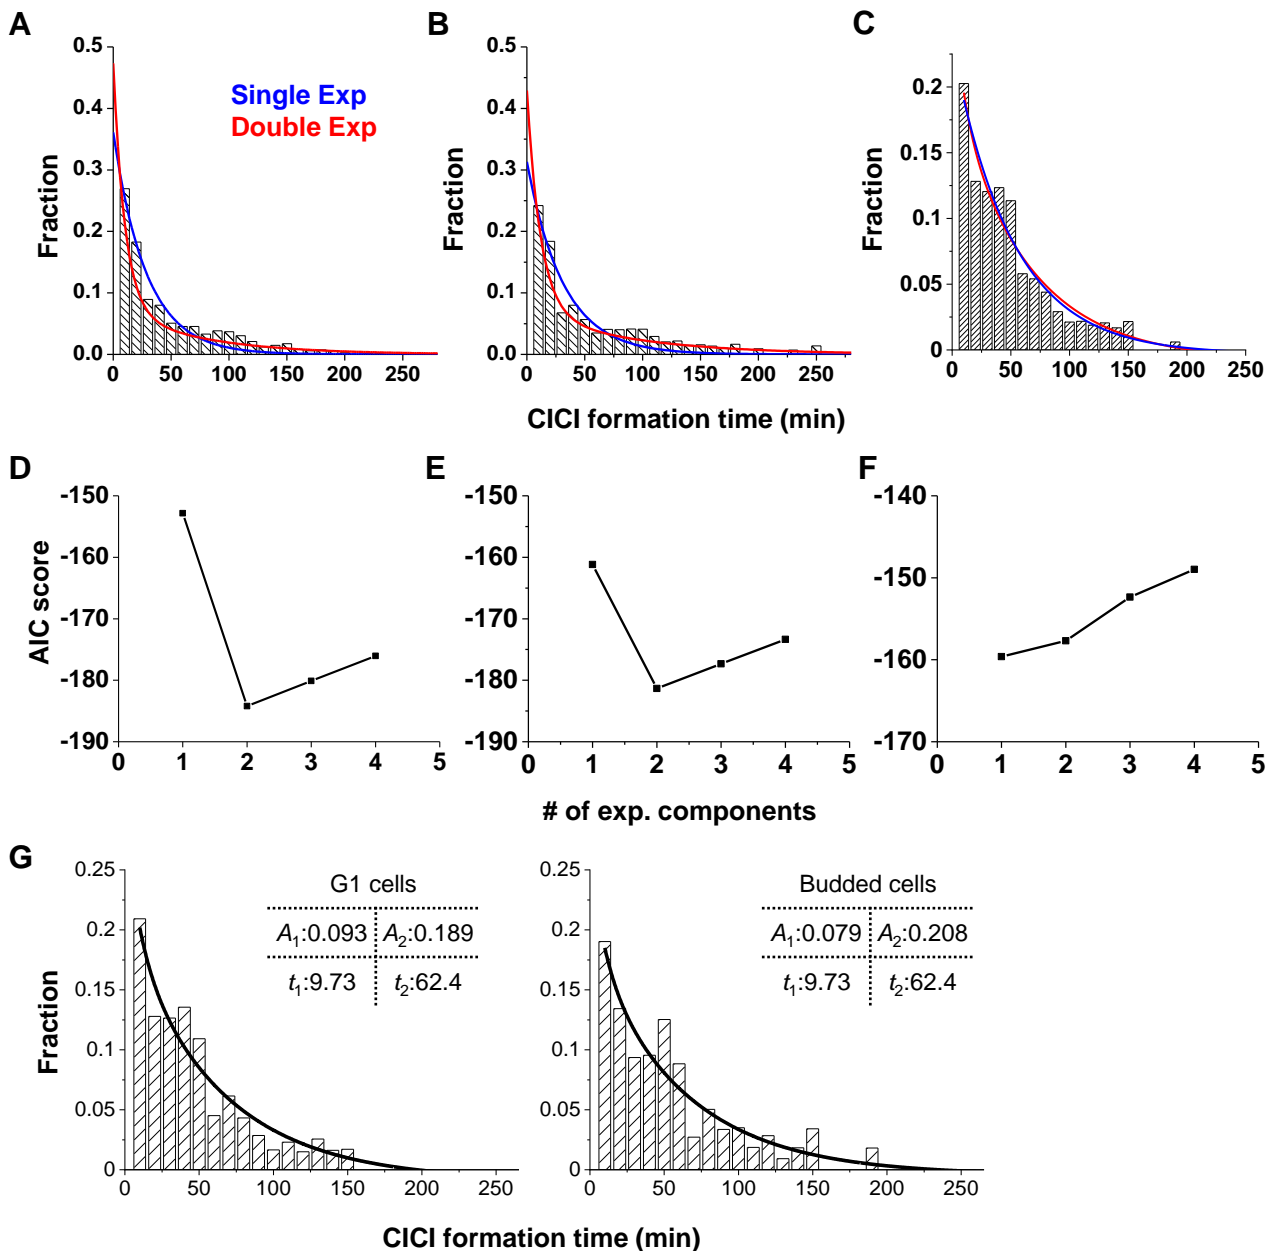

**Supplementary Figure 5. Distribution of CICI formation time fits better with a double exponential function. A-C)** Histogram of CICI formation time, as well as the single (blue) and double (red) exponential fit. The three panels are for CICI pair 5 (A), 4 (B), and 6 (C) (total # were 773, 378 and 524). **D - F)** AIC score of exponential fitting with different number of components for the histogram in A, B, and C. Double exponential function yields the best fit (lowest AIC score) in A&B, but has no advantage in C. **G)** CICI formation time for pair 6 in G1 vs budded cells (total # were 371 and 145 for G1 and budded cells, respectively). The slow component is mildly increased in the budded cell population.

**A**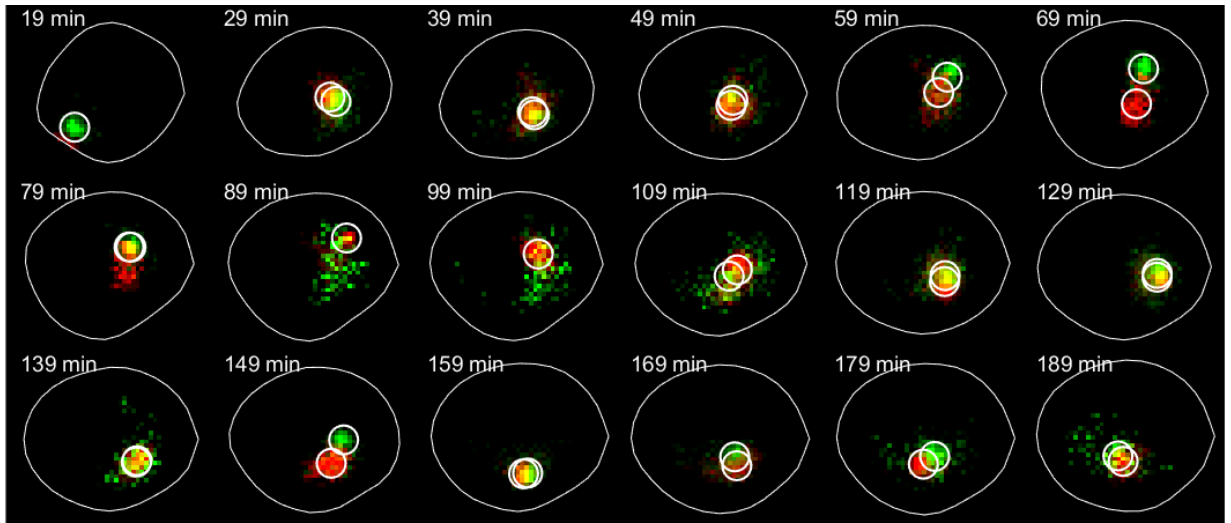**B**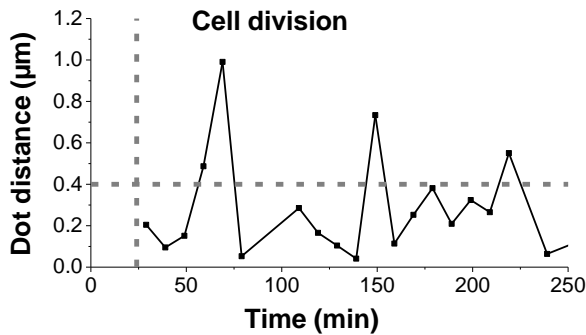**C**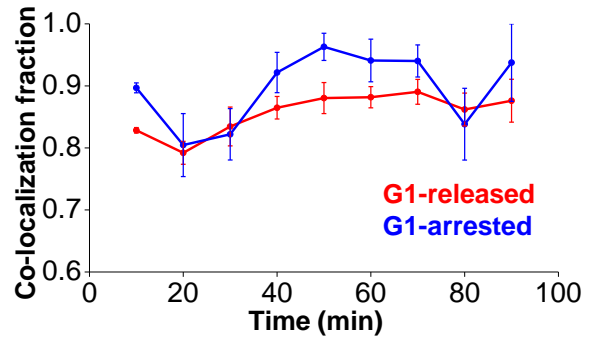

**Supplementary Figure 6. CICI disruption in cell stages other than anaphase. A)** Example time-lapse images of CICI strain (pair 5) that show CICI disruption after cell division. After cell division between 19-29 min, the co-localization of the two dots seem to be disrupted at a few time points, one at 59 min and the other at 149 min. **B)** Distance between LacO and TetO arrays as a function of time for the cell in A. **C)** CICI co-localization fraction in G1-released vs G1-arrested cells (total number of cells:  $N = 705$  and  $2468$  for G1-released and G1-arrested cells, respectively). The cells were arrested in G1 by  $\alpha$ -factor and treated by rapamycin for  $\sim 1.5$  hrs. At 0 min, we washed the cells using media  $\pm \alpha$ -factor to either continue G1 arrest (blue curve) or release from G1 (red curve). The released cells soon started budding (entering S phase), but the co-localization between the two dots did not drop below the G1 level, indicating that replication does not significantly disrupt CICI contacts. Error bars represent standard error.



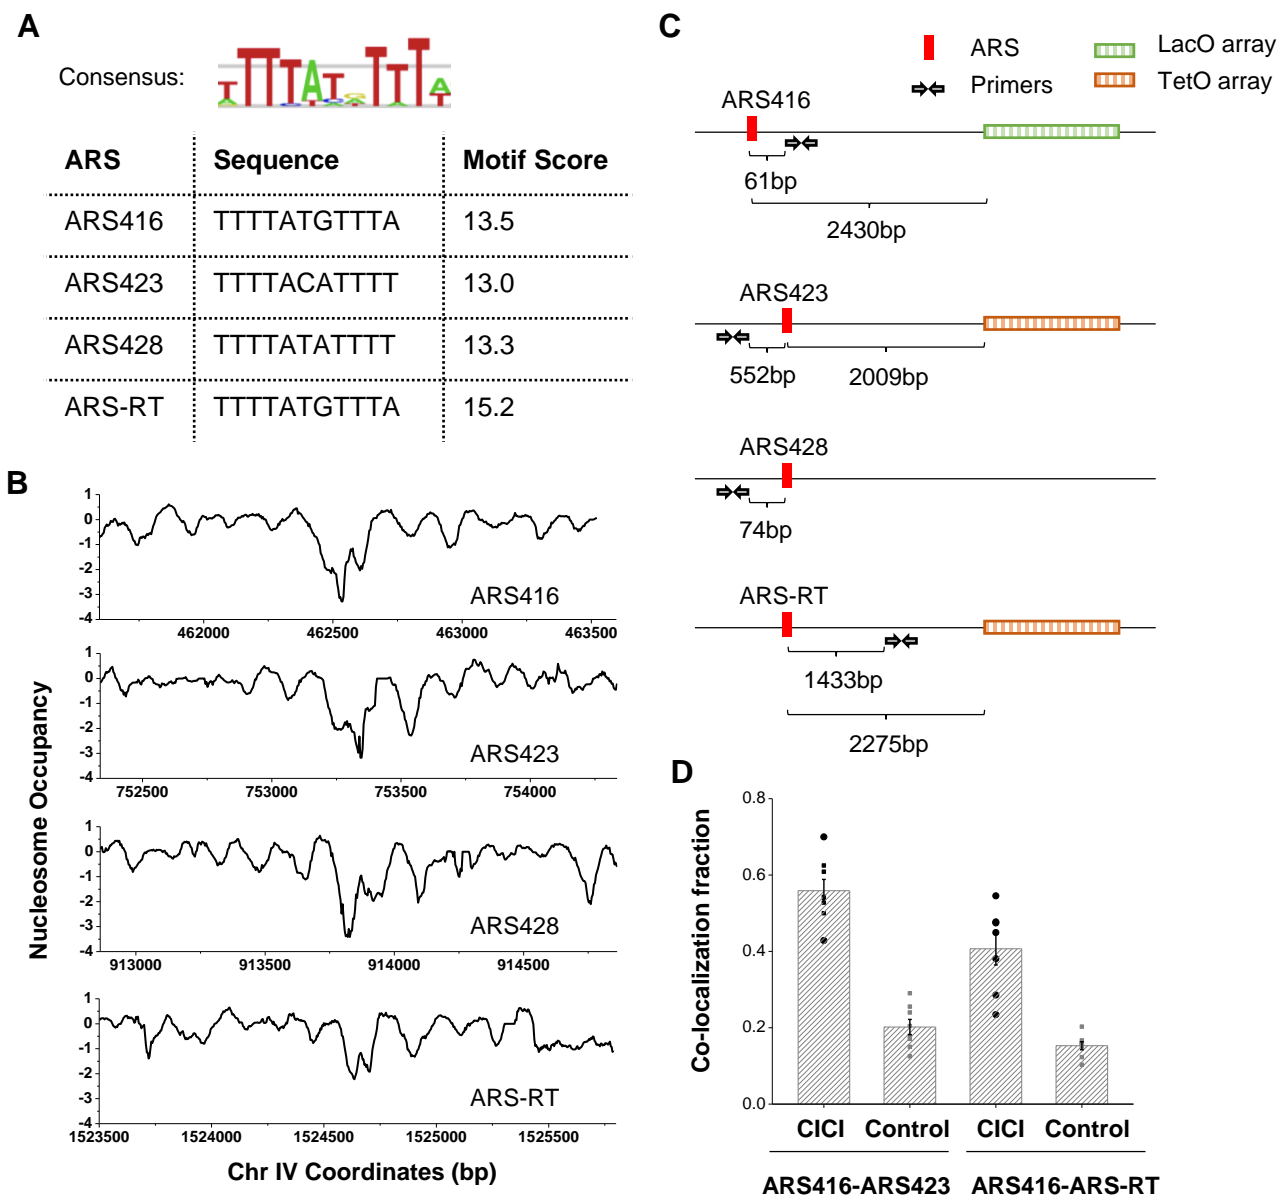

**Supplementary Figure 7. Construction of the CICI strains near ARSs. A)** The consensus sequences of ARS416, ARS423, ARS428, and ARS-RT, and the corresponding motif scores. **B)** Nucleosome occupancy near the three ARSs, all of which show local nucleosome depletion to comparable level. Data are from Lee et al. <sup>48</sup>. **C)** The genetic constructs of the strains. The locations of the qPCR probes for the measurement of DNA copy number (black arrows), LacO array near ARS416, and TetO array near ARS423 or ARS-RT are shown. **D)** Co-localization of the LacO and TetO dots in G1 arrested CICI or control cells after 1hr of rapamycin incubation (total number of cells:  $N = 212$  (CICI) and 512 (control) for ARS416-ARS423 pair, 559 (CICI) and 628 (control) for ARS416-ARS-RT pair). Error bars represent standard error of the fraction.

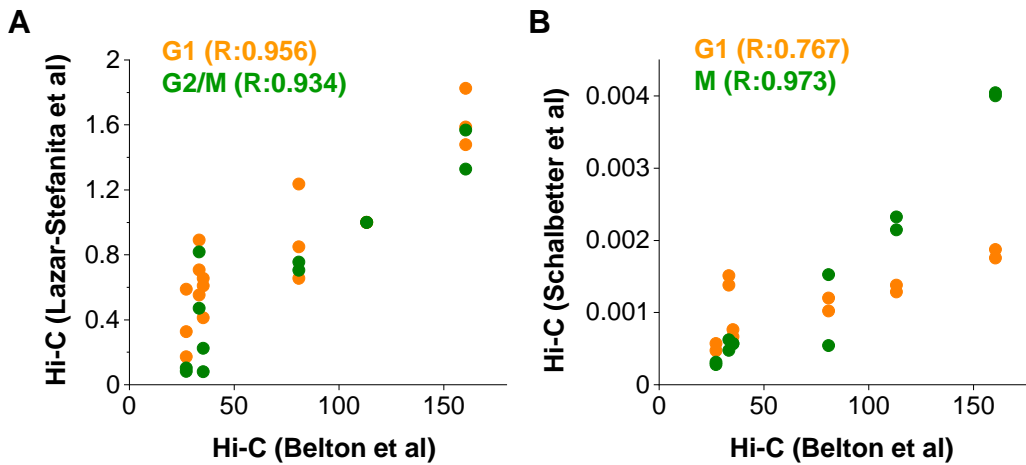

**Supplementary Figure 8. Comparison of Hi-C data used in the manuscript (from Belton et al.) with two more datasets, Lazar-Stefanita et al. and Schalbetter et al.** Belton et al. dataset was measured in asynchronous cell population, while the latter two were carried out in synchronized cells. For Lazar-Stefanita et al, we analyzed the G1 and G2/M data (nocodazole arrest) (biological replica  $N = 3$  and  $2$ , respectively). For Schalbetter et al., we analyzed G1 and M data ( $N = 2$  for both datasets). Hi-C contact frequencies of the six CICI pairs in Fig 2 measured in Belton et al. (x axis) is plotted against those measured in Lazar-Stefanita et al. (A) and Schalbetter et al. (B). “R” represents Pearson correlation. Data points from individual experiments are shown. The raw Hi-C values are also presented in Table S5.

**Supplementary Table 1**

| Plasmid  | Note                                                                                                                                                                                                                      | Note              |
|----------|---------------------------------------------------------------------------------------------------------------------------------------------------------------------------------------------------------------------------|-------------------|
| pSR13    | 256X LacO with a LEU2 marker                                                                                                                                                                                              | Rohner et al.     |
| pSR11    | 192X TetO with a TRP1 marker                                                                                                                                                                                              |                   |
| pLB49_K1 | Unique sequences K1 flanking an URA3 selection marker                                                                                                                                                                     | This study        |
| pLB49_K2 | Unique sequences K2 flanking an URA3 selection marker                                                                                                                                                                     |                   |
| pMY48    | <i>REV1pr-LacI-FKBP12-REV1pr-TetR-FRB</i> with an ADE2 marker                                                                                                                                                             |                   |
| pMY49    | <i>REV1pr-LacI-REV1pr-TetR</i> with an ADE2 marker                                                                                                                                                                        |                   |
| pMY63    | <i>REV1pr-LacI-GFP-REV1pr-TetR-mCherry</i> with a HIS3 marker                                                                                                                                                             |                   |
| pMY75    | <i>GAL10-HO</i> with an URA3 marker                                                                                                                                                                                       |                   |
|          |                                                                                                                                                                                                                           |                   |
| Strain   | Genotype                                                                                                                                                                                                                  | Note              |
| yLB109   | <i>MAT<sub>a</sub>, tor1-1, fpr::NAT, bar1</i>                                                                                                                                                                            | background strain |
| yMD215   | <i>MAT<sub>a</sub>, tor1-1, fpr::NAT, bar1, HIS3::REV1pr-tetR-mCherry-REV1pr-LacI-GFP, ADE2::REV1pr-LacI-FKBP12-REV1pr-TetR-FRB</i>                                                                                       |                   |
| yMD216   | <i>MAT<sub>a</sub>, tor1-1, fpr::NAT, bar1, HIS3::REV1pr-tetR-mCherry-REV1pr-LacI-GFP, ADE2::REV1pr-LacI-REV1pr-tetR</i>                                                                                                  |                   |
| yMD251   | <i>MAT<sub>a</sub>, tor1-1, fpr::NAT, bar1, HIS3::REV1pr-tetR-mCherry-REV1pr-LacI-GFP, ADE2::REV1pr-LacI-FKBP12-REV1pr-TetR-FRB, Chr15::433495_LacO, Chr15::214015_TetO</i>                                               | 100kb_CICI        |
| yMD259   | <i>MAT<sub>a</sub>, tor1-1, fpr::NAT, bar1, HIS3::REV1pr-tetR-mCherry-REV1pr-LacI-GFP, ADE2::REV1pr-LacI-REV1pr-tetR, Chr15::433495_LacO, Chr15::214015_TetO</i>                                                          | 100kb_Control     |
| yMD266   | <i>MAT<sub>a</sub>, tor1-1, fpr::NAT, bar1, HIS3::REV1pr-tetR-mCherry-REV1pr-LacI-GFP, ADE2::REV1pr-LacI-FKBP12-REV1pr-TetR-FRB, Chr15::497047_LacO, Chr15::150277_TetO</i>                                               | 150kb_CICI        |
| yMD249   | <i>MAT<sub>a</sub>, tor1-1, fpr::NAT, bar1, HIS3::REV1pr-tetR-mCherry-REV1pr-LacI-GFP, ADE2::REV1pr-LacI-REV1pr-tetR, Chr15::497047_LacO, Chr15::150277_TetO</i>                                                          | 150kb_Control     |
| yMD292   | <i>MAT<sub>a</sub>, tor1-1, fpr::NAT, bar1, HIS3::REV1pr-tetR-mCherry-REV1pr-LacI-GFP, ADE2::REV1pr-LacI-FKBP12-REV1pr-TetR-FRB, Chr15::497047_LacO, Chr15::834487_TetO</i>                                               | 300kb_CICI        |
| yMD291   | <i>MAT<sub>a</sub>, tor1-1, fpr::NAT, bar1, HIS3::REV1pr-tetR-mCherry-REV1pr-LacI-GFP, ADE2::REV1pr-LacI-REV1pr-tetR, Chr15::497047_LacO, Chr15::834487_TetO</i>                                                          | 300kb_Control     |
| yMD282   | <i>MAT<sub>a</sub>, tor1-1, fpr::NAT, bar1, HIS3::REV1pr-tetR-mCherry-REV1pr-LacI-GFP, ADE2::REV1pr-LacI-FKBP12-REV1pr-TetR-FRB, Chr12::616331_LacO, Chr12::306772_TetO</i>                                               | Chr12_CICI        |
| yMD283   | <i>MAT<sub>a</sub>, tor1-1, fpr::NAT, bar1, HIS3::REV1pr-tetR-mCherry-REV1pr-LacI-GFP, ADE2::REV1pr-LacI-REV1pr-tetR, Chr12::616331_LacO, Chr12::306772_TetO</i>                                                          | Chr12_Control     |
| yMD274   | <i>MAT<sub>a</sub>, tor1-1, fpr::NAT, bar1, HIS3::REV1pr-tetR-mCherry-REV1pr-LacI-GFP, ADE2::REV1pr-LacI-FKBP12-REV1pr-TetR-FRB, Chr15::497047_LacO, Chr12::306772_TetO</i>                                               | inter_CICI (1)    |
| yMD275   | <i>MAT<sub>a</sub>, tor1-1, fpr::NAT, bar1, HIS3::REV1pr-tetR-mCherry-REV1pr-LacI-GFP, ADE2::REV1pr-LacI-REV1pr-tetR, Chr15::497047_LacO, Chr12::306772_TetO</i>                                                          | inter_Control (1) |
| yMD320   | <i>MAT<sub>a</sub>, tor1-1, fpr::NAT, bar1, HMR::HMR<math>\alpha</math>-B, GAL10::GAL10pr-HO, HIS3::REV1pr-tetR-mCherry-REV1pr-LacI-GFP, ADE2::REV1pr-LacI-FKBP12-REV1pr-TetR-FRB, MAT::206345_LacO, HMR::299404_TetO</i> | MAT_CICI          |

|        |                                                                                                                                                                                                  |                       |
|--------|--------------------------------------------------------------------------------------------------------------------------------------------------------------------------------------------------|-----------------------|
| yMD323 | MAT <sub>a</sub> , tor1-1, fpr::NAT, bar1, HMR::HMR $\alpha$ -B, GAL10::GAL10pr-HO, HIS3::REV1pr-tetR-mCherry-REV1pr-LacI-GFP, ADE2::REV1pr-LacI-REV1pr-TetR, MAT::206345_LacO, HMR::299404_TetO | MAT_Control           |
| yFZ43  | MAT <sub>a</sub> , tor1-1, fpr::NAT, bar1, HIS3::REV1pr-tetR-mCherry-REV1pr-LacI-GFP, ADE2::REV1pr-LacI-FKBP12-REV1pr-TetR-FRB, Chr4::465035_LacO, Chr4::1522313_TetO                            | ARS416-ARS_RT         |
| yFZ44  | MAT <sub>a</sub> , tor1-1, fpr::NAT, bar1, HIS3::REV1pr-tetR-mCherry-REV1pr-LacI-GFP, ADE2::REV1pr-LacI-REV1pr-tetR, Chr4::465035_LacO, Chr4::1522313_TetO                                       | ARS416-ARS_RT control |
| yFZ45  | MAT <sub>a</sub> , tor1-1, fpr::NAT, bar1, HIS3::REV1pr-tetR-mCherry-REV1pr-LacI-GFP, ADE2::REV1pr-LacI-FKBP12-REV1pr-TetR-FRB, Chr4::465035_LacO, Chr4:755413_TetO                              | ARS416-ARS423         |
| yFZ46  | MAT <sub>a</sub> , tor1-1, fpr::NAT, bar1, HIS3::REV1pr-tetR-mCherry-REV1pr-LacI-GFP, ADE2::REV1pr-LacI-REV1pr-tetR, Chr4::465035_LacO, Chr4:755413_TetO                                         | ARS416-ARS423 control |
| yFZ47  | MAT <sub>a</sub> , tor1-1, fpr::NAT, bar1, HIS3::REV1pr-tetR-mCherry-REV1pr-LacI-GFP, ADE2::REV1pr-LacI-FKBP12-REV1pr-TetR-FRB, Chr4::465035_LacO, Chr4:916082_TetO                              | ARS416-ARS428         |
| yFZ48  | MAT <sub>a</sub> , tor1-1, fpr::NAT, bar1, HIS3::REV1pr-tetR-mCherry-REV1pr-LacI-GFP, ADE2::REV1pr-LacI-REV1pr-tetR, Chr4::465035_LacO, Chr4:916082_TetO                                         | ARS416-ARS428 control |
| yFZ78  | MAT <sub>a</sub> , tor1-1, fpr::NAT, bar1, HIS3::REV1pr-tetR-mCherry-REV1pr-LacI-GFP, ADE2::REV1pr-LacI-FKBP12-REV1pr-TetR-FRB, Chr15::433495_LacO, Chr4:916082_TetO                             | inter_CICI (2)        |
| yFZ77  | MAT <sub>a</sub> , tor1-1, fpr::NAT, bar1, HIS3::REV1pr-tetR-mCherry-REV1pr-LacI-GFP, ADE2::REV1pr-LacI-REV1pr-tetR, Chr15::433495_LacO, Chr4:916082_TetO                                        | inter_Control (2)     |

## Supplementary Table 2

All primers are purchased from Integrated DNA Technologies

|                            |                              |
|----------------------------|------------------------------|
| Primers for ARS416         |                              |
| PF-ARS416                  | AGGAAAATATACATCGCAGGGG       |
| PR-ARS416                  | GGTCATTGTAGCGTATGCG          |
|                            |                              |
| Primers for ARS423         |                              |
| PF3-ARS423                 | GTAAGGATGACATCTCAGTGGG       |
| PR3-ARS423                 | GCACATCATTATAGTCTTGCATCC     |
|                            |                              |
| Primers for ARS428         |                              |
| PF-ARS428                  | CCACTTGAGAGAGGATCAAGG        |
| PR-ARS428                  | CCACCGACTCTATAAGTACACAGC     |
|                            |                              |
| Primers for ARS-RT         |                              |
| PF3-ARS-RT                 | CACCAGCTGGTGAAGGAATTTG       |
| PR3-ARS-RT                 | AGTGCTGATATAAGCCCTACTAGGAAG  |
|                            |                              |
| Primers for Chr14-222k     |                              |
| PF_Chr14_222k              | ATCCTGCGCGTTGACATAA          |
| PR_Chr14_222k              | CAATTTTGCTCAACGTCTGCA        |
|                            |                              |
| Primer for 3C measurement: |                              |
| P-F-CIClpair3              | TACTGACGTTTCAGTAGTTAATCCAGAG |
| P-R-CIClpair3              | GTAACCTTGGGAAGACGCTCCAC      |
| P-F-CIClpair5              | CATGAATACTTCCAAAACAAACAAC    |
| P-R-CIClpair5              | CCAAAACCTTGCTGTTTCATATGACAAC |
| P-F-CICl-outerLoop1        | ATCTAGTTTCTTGTCACCTCATACG    |
| P-R-CICl-outerLoop1        | CTCCTTCAATAGTTTATTTAGGGAAGC  |
| P-F-CICl-outerLoop2        | CACCTCATTGTTGTATAGAACCTCTGC  |
| P-R-CICl-outerLoop2        | GCGTAAACATTTCAGAGAAGTACATGAC |
| P-F-CICl-outerLoop3        | GTCATTGGTTGCAAAAACAACTCTAC   |
| P-R-CICl-outerLoop3        | CCTCTTTGACTAGGCATCTGATAATG   |
| P-F-CICl-outerLoop4        | CCAAGTGTATTGGGTACGATTCC      |
| P-R-CICl-outerLoop4        | AAGTCACATATCGAGTCGAAATCGG    |
| P-F-CICl-innerLoop1        | GCTCGTGCCATCACAATTAATATAAGG  |
| P-R-CICl-innerLoop1        | AATCGTGAAGAATTTCCAGATTTAACAG |
| P-F-CICl-innerLoop2        | ACCTCAATTGGTACAAATGTATATCGG  |
| P-R-CICl-innerLoop2        | TGGTTTCTCAGCAGTTCTACTACTG    |
| P-F-CICl-innerLoop3        | GTTTACCGAACCATTTATGGTTCTC    |
| P-R-CICl-innerLoop3        | CACCTTTTACCAGCATTCTTGAAGG    |

Primer for DNA repair assay:

|             |                                |
|-------------|--------------------------------|
| PF_MATa     | GGGTATGTAATATGAGAATC           |
| PF1-MAT-B   | GCCCACTTCTAAGCTGATTTCAATCTCTCC |
| PR2-MAT-B   | CCTGTTCTTAGCTTGTACCAGAGG       |
| PMY-F1-ACT1 | GGTAACGAAAGATTCAGAGCCCC        |
| PMY-R1-ACT1 | CGACATCACACTTCATGATGGAG        |

**Supplementary Table 3**

Biological replica #1

| time (min) | CT values of ARS416 |       |       | CT values of ARS423 |       |       | CT values of ARS428 |       |       | CT values of ARS-RT |       |       | CT values of Chr14-222k |       |       |
|------------|---------------------|-------|-------|---------------------|-------|-------|---------------------|-------|-------|---------------------|-------|-------|-------------------------|-------|-------|
| 0          | 19.15               | 19.27 | 19.25 | 18.95               | 18.96 | 18.98 | 19.31               | 19.46 | 19.38 | 19.87               | 19.86 | 19.85 | 18.94                   | 18.82 | 18.97 |
| 10         | 18.75               | 18.62 | 18.74 | 18.27               | 18.26 | 18.35 | 18.73               | 18.76 | 18.76 | 19.2                | 19.15 | 19.15 | 18.59                   | 18.21 | 18.4  |
| 20         | 17.97               | 18.03 | 18.11 | 18.24               | 18.22 | 18.05 | 18.17               | 18.11 | 18.12 | 19.14               | 18.93 | 19.24 | 18.33                   | 18.49 | 18.3  |
| 30         | 17.55               | 17.84 | 17.91 | 17.91               | 17.74 | 17.87 | 17.91               | 17.7  | 17.88 | 18.86               | 18.86 | 18.92 | 18.33                   | 18.46 | 18.41 |
| 40         | 18.37               | 18.62 | 18.66 | 18.55               | 18.54 | 18.52 | 18.66               | 18.7  | 18.76 | 19.48               | 19.3  | 19.63 | 18.92                   | 18.92 | 19.04 |
| 50         | 18.11               | 18.05 | 18.21 | 18.05               | 18.03 | 17.99 | 18.34               | 18.36 | 18.36 | 19.06               | 18.75 | 18.82 | 18.47                   | 18.35 | 18.39 |
| 60         | 18.4                | 18.34 | 18.42 | 18.03               | 18    | 18.15 | 18.46               | 18.52 | 18.51 | 18.91               | 18.99 | 18.98 | 18.05                   | 17.94 | 18.1  |
| 70         | 17.74               | 17.65 | 17.74 | 17.3                | 17.28 | 17.34 | 17.71               | 17.74 | 17.67 | 18.22               | 18.19 | 18.24 | 17.53                   | 17.19 | 17.42 |
| 80         | 17.23               | 17.43 | 17.42 | 17.23               | 17.24 | 17.09 | 17.55               | 17.54 | 17.47 | 17.99               | 17.93 | 18.16 | 17.21                   | 17.38 | 17.21 |

Biological replica #2

| time (min) | CT values of ARS416 |       |       | CT values of ARS423 |       |       | CT values of ARS428 |       |       | CT values of ARS-RT |       |       | CT values of Chr14-222k |       |       |
|------------|---------------------|-------|-------|---------------------|-------|-------|---------------------|-------|-------|---------------------|-------|-------|-------------------------|-------|-------|
| 0          | 18.58               | 18.45 | 18.39 | 17.89               | 17.96 | 17.98 | 18.37               | 18.3  | 18.35 | 18.73               | 18.74 | 18.83 | 18.29                   | 18.18 | 18.17 |
| 10         | 18.56               | 18.49 | 18.43 | 17.92               | 18    | 17.89 | 18.4                | 18.36 | 18.31 | 18.73               | 18.68 | 18.78 | 18.38                   | 18.31 | 18.27 |
| 20         | 18.32               | 18.13 | 18.21 | 18.04               | 17.96 | 17.95 | 17.96               | 18.13 | 18.13 | 18.92               | 18.77 | 18.97 | 18.4                    | 18.33 | 18.35 |
| 30         | 17.73               | 17.68 | 17.66 | 17.49               | 17.47 | 17.51 | 17.62               | 17.56 | 17.67 | 18.42               | 18.62 | 18.45 | 18.16                   | 18.19 | 18.21 |
| 40         | 17.6                | 17.58 | 17.51 | 17.25               | 17.23 | 17.33 | 17.56               | 17.53 | 17.43 | 17.98               | 18.17 | 18.09 | 17.71                   | 17.74 | 17.81 |
| 50         | 17.48               | 17.57 | 17.46 | 17.02               | 17.07 | 17.1  | 17.42               | 17.4  | 17.52 | NaN                 | 17.8  | 17.89 | 17.45                   | 17.56 | 17.6  |
| 60         | 17.29               | 17.55 | 17.68 | 17.17               | 17.13 | 17.24 | 17.71               | 17.46 | 17.7  | 18.05               | 18.09 | 18.12 | 17.43                   | 17.6  | 17.77 |
| 70         | 16.74               | 16.94 | 16.98 | 16.76               | 16.74 | 16.7  | 16.99               | 16.97 | 16.93 | 17.36               | 17.1  | 17.5  | 16.95                   | 16.96 | NaN   |
| 80         | 16.89               | 16.85 | 16.99 | 16.84               | 16.87 | 16.83 | 17.11               | 17.08 | 17.07 | 17.47               | 17.26 | 17.23 | 17.08                   | 17    | NaN   |

Biological replica #3

| time (min) | CT values of ARS416 |       |       | CT values of ARS423 |       |       | CT values of ARS428 |       |       | CT values of ARS-RT |       |       | CT values of Chr14-222k |       |       |
|------------|---------------------|-------|-------|---------------------|-------|-------|---------------------|-------|-------|---------------------|-------|-------|-------------------------|-------|-------|
| 0          | 18.14               | 18.21 | 18.33 | 17.9                | 17.87 | 17.89 | 18.26               | 18.39 | 18.36 | 18.66               | 18.67 | 18.66 | 17.78                   | 17.67 | 17.83 |
| 10         | 18.28               | 18.21 | 18.29 | 17.92               | 17.9  | 17.92 | 18.29               | 18.38 | 18.36 | 18.72               | 18.66 | 18.66 | 18.2                    | 17.89 | 17.94 |
| 20         | 17.74               | 17.85 | 17.94 | 17.78               | 17.74 | 17.59 | 18.06               | 18.04 | 18.09 | 18.52               | 18.46 | 18.61 | 17.75                   | 17.86 | 17.7  |
| 30         | 17.41               | 17.65 | 17.76 | 17.55               | 17.56 | 17.7  | 17.7                | 17.48 | 17.69 | 18.4                | 18.45 | 18.5  | 17.79                   | 17.91 | 17.88 |
| 40         | 17.19               | 17.46 | 17.42 | 17.43               | 17.35 | 17.34 | 17.38               | 17.45 | 17.42 | 18.11               | 17.89 | 18.31 | 17.83                   | 17.8  | 17.93 |
| 50         | 17.1                | 17.1  | 17.26 | 17.04               | 17.1  | 17.03 | 17.3                | 17.33 | 17.24 | 17.94               | 17.62 | 17.69 | 17.47                   | 17.47 | 17.4  |
| 60         | 17.38               | 17.36 | 17.36 | 17.07               | 17.05 | 17    | 17.29               | 17.17 | 17.34 | 17.81               | 17.94 | 17.83 | 17.47                   | 17.52 | 17.56 |
| 70         | 17.39               | 17.31 | 17.25 | 17.06               | 17    | 17.05 | 17.24               | 17.19 | 17.17 | 17.72               | 17.85 | 17.79 | 17.33                   | 17.34 | 17.45 |
| 80         | 17.32               | 17.34 | 17.19 | 16.99               | 17.02 | 17.05 | 17.26               | 17.17 | 17.34 | 17.76               | 17.68 | 17.73 | 17.2                    | 17.26 | 17.34 |
